# Supplementary material for: What methods are being used to create an evidence base on the use of laboratory tests to monitor long-term conditions in primary care? A scoping review
Source: PubMed Central journal article supplement — Fam Pract. 2020 Aug 21;37(6):845–53. doi: 10.1093/fampra/cmaa074 (PMC7759753; doi:10.1093/fampra/cmaa074), 2020-08-21
Supplement: cmaa074_suppl_supplementary_data.pdf [file cmaa074_suppl_supplementary_data.pdf]

## Supplementary material

Table S1

| Reference                            | Year | Location       | Research objective                                                                                                                                                                                                                                                                                                                                           |
|--------------------------------------|------|----------------|--------------------------------------------------------------------------------------------------------------------------------------------------------------------------------------------------------------------------------------------------------------------------------------------------------------------------------------------------------------|
| Afifa et al <sup>1</sup>             | 2016 | Tunisia        | To determine the prevalence of microalbuminuria and describe the Micral-test validity.                                                                                                                                                                                                                                                                       |
| Aizpuru et al <sup>2</sup>           | 2012 | Spain          | To describe the variability in the detection and surveillance of chronic conditions in primary care                                                                                                                                                                                                                                                          |
| Al-Foraih N et al <sup>3</sup>       | 2017 | Canada         | To identify which laboratory tests were associated with lupus outcomes including flare, mortality and damage                                                                                                                                                                                                                                                 |
| Allen et al <sup>4</sup>             | 2010 | USA            | To assess quality of care for Chronic Kidney Disease according to patient risk and identify correlates of improved care delivery                                                                                                                                                                                                                             |
| Al-Naher et al <sup>5</sup>          | 2018 | United Kingdom | To review the optimal frequency of monitoring renal function in heart failure patients                                                                                                                                                                                                                                                                       |
| Arena et al <sup>6</sup>             | 2014 | Brazil         | To analyse the requests and expenditures of unnecessary tests for hypertensive and diabetic patients                                                                                                                                                                                                                                                         |
| Aziz KM et al <sup>7</sup>           | 2015 | Saudi Arabia   | To utilize spot urine protein among diabetic patients and to find its association with routine dipstick urine test for albumin, and microalbuminuria                                                                                                                                                                                                         |
| Bajwa-Dulai et al <sup>8</sup>       | 2013 | Lebanon        | To quantify the overall frequency of abnormal results and the proportion of patients with abnormal results in whom testing led to a meaningful change in care.                                                                                                                                                                                               |
| Bakarman et al <sup>9</sup>          | 1997 | Saudi Arabia   | To investigate the utilisation of lab testing in primary health care centres in the Al-Khobar area.                                                                                                                                                                                                                                                          |
| Bell et al <sup>10</sup>             | 2014 | Australia      | To describe how evidence from trials and cohort studies may be used to guide choice of test for monitoring patients with chronic disease.                                                                                                                                                                                                                    |
| Bialkowska-Warzecha J <sup>11</sup>  | 1998 | Poland         | Is 99mTc-Hepida plasma clearance test a useful investigation in assessing the course of cirrhosis of the liver?                                                                                                                                                                                                                                              |
| Bozic-Mijovski M et al <sup>12</sup> | 2016 | Slovenia       | To assess a diluted thrombin (dTT) assay based on the same thrombin reagent already used for traditional thrombin time measurements, which reliably measures low to intermediate plasma dabigatran levels.                                                                                                                                                   |
| Bramlage P et al <sup>13</sup>       | 2003 | Germany        | To show the prevalence of a single positive test result for microalbuminuria in hypertensive and diabetic patients that present in primary care and the association of a positive test with the prevalence of secondary diseases and the severity of symptoms. To investigate whether routine monitoring of microalbuminuria is established in primary care. |
| Bull et al <sup>14</sup>             | 1986 | United Kingdom | To evaluate the ability of a newly devised statistical method "consensus analysis" to identify the best test for monitoring disease activity in rheumatoid arthritis.                                                                                                                                                                                        |
| Cohen et al <sup>15</sup>            | 2018 | USA            | To assess how often clinicians assess the effectiveness of statin treatment                                                                                                                                                                                                                                                                                  |

| Reference                                        | Year | Location       | Research objective                                                                                                                                                                                                                                                                                                                                                                                                              |
|--------------------------------------------------|------|----------------|---------------------------------------------------------------------------------------------------------------------------------------------------------------------------------------------------------------------------------------------------------------------------------------------------------------------------------------------------------------------------------------------------------------------------------|
| <b>Coleman et al<sup>16</sup></b>                | 2010 | United Kingdom | To examine the extent and effect of laboratory monitoring in a cohort of patients in UK general practice with newly diagnosed hypertension and newly treated with antihypertensive drugs.                                                                                                                                                                                                                                       |
| <b>Crippa et al<sup>17</sup></b>                 | 2012 | Italy          | To investigate the association between uric acid and cardiovascular disease in hypertensive patients                                                                                                                                                                                                                                                                                                                            |
| <b>Curtis et al<sup>18</sup></b>                 | 2012 | USA            | To evaluate the proportion of RA patients receiving lipid testing and the frequency of testing compared to controls (patients with osteoarthritis [OA]).                                                                                                                                                                                                                                                                        |
| <b>Dauernheimer Machado J et al<sup>19</sup></b> | 2015 | Brazil         | To evaluate the accuracy of creatinine and cystatin C equations, either alone or in combination, to estimate GFR in type 2 DM patients as compared to healthy adults.                                                                                                                                                                                                                                                           |
| <b>DeLong et al<sup>20</sup></b>                 | 1985 | USA            | To use a partial likelihood solution to the discrete logistic model in order to obtain estimates of the diagnostic test indices and to provide a significance test when the diagnostic test is administered repeatedly to individuals                                                                                                                                                                                           |
| <b>Doganer et al<sup>21</sup></b>                | 2014 | USA            | To assess the degree to which the frequency of lipid screening tests exceeds recommendations among family medicine patients who have cardiovascular risk factors, to test the association between testing frequency and achievement of lipid goals, and to identify predictors of more frequent testing.                                                                                                                        |
| <b>Dolan et al<sup>22</sup></b>                  | 2008 | United Kingdom | To investigate the relationship between time spent in the recommended target International Normalised Ratio (INR) range and the setting and intensity of anticoagulant monitoring, in both treatment-experienced and treatment-naïve atrial fibrillation (AF) patients receiving oral anticoagulation (OAC) therapy for the prevention of ischaemic stroke.                                                                     |
| <b>Doll et al<sup>23</sup></b>                   | 2011 | United Kingdom | To (1) report the change in the number of cholesterol tests during the 20-year period by source (primary or secondary care) and patient demographics (age, sex); (2) calculate the number of tests by 3-year period and estimate the proportion of tests for monitoring rather than diagnosis, and the proportion that may be unnecessary; and (3) relate frequency of testing to estimated changes in mean cholesterol levels. |
| <b>Duddy et al<sup>24</sup></b>                  | 2018 | United Kingdom | To improve our understanding of how and why variation in laboratory test ordering comes about                                                                                                                                                                                                                                                                                                                                   |
| <b>Duff et al<sup>25</sup></b>                   | 2018 | United Kingdom | To examine the effect of tests/year on achievement of commonly utilised HbA1c targets and on HbA1c changes over time.                                                                                                                                                                                                                                                                                                           |
| <b>Dufour et al<sup>26</sup></b>                 | 2000 | USA            | To review information of performance characteristics for tests that are commonly used to identify (and monitor?) acute and chronic hepatic injury, with the aim of developing new guidelines.                                                                                                                                                                                                                                   |
| <b>Elhayany A et al<sup>27</sup></b>             | 2011 | Israel         | To evaluate the clinical impact of abnormal liver and muscle enzyme test results on patients in primary care practice who are on statin therapy.                                                                                                                                                                                                                                                                                |
| <b>Farmer et al<sup>28</sup></b>                 | 2014 | NA             | To estimate the clinical value and cost-effectiveness of different screening intervals to diagnose early diabetic kidney disease in type1 and 2 diabetics.                                                                                                                                                                                                                                                                      |

| Reference                             | Year | Location                           | Research objective                                                                                                                                                                                                                                                                                                    |
|---------------------------------------|------|------------------------------------|-----------------------------------------------------------------------------------------------------------------------------------------------------------------------------------------------------------------------------------------------------------------------------------------------------------------------|
| Fazlalizadeh et al <sup>29</sup>      | 2014 | United Kingdom                     | To assess whether plasma concentration of aminoterminal probrain natriuretic peptide (NTproBNP) could be a simple tool for screening for cardiovascular disease and cardiac dysfunction amongst older patients with Type 2 diabetes                                                                                   |
| Fazlalizadeh H et al <sup>30</sup>    | 2014 | United Kingdom                     | To investigate whether natriuretic peptides or glycosolated haemoglobin can be used as markers of micro and macrovascular complications amongst older patients with type 2 diabetes mellitus.                                                                                                                         |
| Fischer SH et al <sup>31</sup>        | 2014 | US                                 | To determine physician factors associated with ordering recommended laboratory monitoring tests for high-risk medications.                                                                                                                                                                                            |
| Flynn D et al <sup>32</sup>           | 2015 | Ireland                            | To identify all patients in a GP practice prescribed NOACs and to measure the percentage that had annual renal function monitoring since commencing treatment. To check if a patient's dosing is correct as per their creatinine clearance (CrCl).                                                                    |
| Garg D et al <sup>33</sup>            | 2018 | Canada                             | To calculate the positive predictive value (PPV) of a single random abnormal urine ACR compared with repeat test results in patients with type 2 diabetes to diagnose CKD. We also explored the relationship between the first and second urine ACR values (between 2 and 20 mg/mmol) when performed within 120 days. |
| Garg et al <sup>34</sup>              | 2018 | Canada                             | To determine if there is Canadian Diabetes Association (CDA) guideline compliant screening for chronic kidney disease in patients with diabetes. We explore relation to patient age, gender, hypertension and urban versus rural practice.                                                                            |
| Glasziou PP et al <sup>35</sup>       | 2008 | Australia and New Zealand          | To estimate, in patients receiving cholesterol-lowering medication, the variation in initial response to treatment, the longterm drift from initial response, and the detectability of long-term changes in on-treatment cholesterol level ("signal") given shortterm, within-person variation ("noise").             |
| Glasziou PP et al <sup>36</sup>       | 2013 | Australia, New Zealand and Finland | To evaluate the optimal lipid to measure in monitoring patients, we assessed three factors that influence the choice of monitoring tests: (1) clinical validity; (2) responsiveness to therapy changes and (3) the size of the long-term 'signal-to-noise' ratio.                                                     |
| Griger DR et al <sup>37</sup>         | 1999 | US                                 | To investigate the utility of liver enzyme monitoring in RA patients undergoing treatment with azathioprine.                                                                                                                                                                                                          |
| Gudmundsdottir BR et al <sup>38</sup> | 2018 | Iceland                            | To evaluate anticoagulation variability, testing and dose adjustment frequency during FIIIX-NR monitoring compared to prior warfarin management using standard INR in the same patients treated for one year before and after monitoring test replacement and in warfarin naive patients.                             |
| Hajati et al <sup>39</sup>            | 2018 | Australia                          | To examine the extent to which the adult Australian population on lipid-lowering medications receives the level of high-density lipoprotein cholesterol (HDL-C) testing recommended by national guidelines.                                                                                                           |
| Harano et al <sup>40</sup>            | 1984 | Japan                              | To assess whether quantification of serum levels of ketone bodies is useful (a) to differentiate Type 1 from Type 2 diabetes, and (b) to monitor diabetic control                                                                                                                                                     |
| Harish S et al <sup>41</sup>          | 2019 | India                              | To evaluate the correlation between salivary and serum levels of glucose in non-diabetic and diabetic (controlled and uncontrolled) individuals.                                                                                                                                                                      |
| Heyman et al <sup>42</sup>            | 2007 | Sweden                             | To investigate the sufficiency of S-cholesterol analysis (TC) in monitoring all blood lipids                                                                                                                                                                                                                          |

| Reference                      | Year | Location       | Research objective                                                                                                                                                                                                                                          |
|--------------------------------|------|----------------|-------------------------------------------------------------------------------------------------------------------------------------------------------------------------------------------------------------------------------------------------------------|
| Hinton et al <sup>43</sup>     | 2017 | United Kingdom | To compare glycaemic control (HbA1c), renal function using estimated glomerular filtration rate (eGFR), and blood pressure (BP) across socio-economic status and ethnic groups, and identified any disparities contributing to these incongruent outcomes.  |
| Hirst et al <sup>44</sup>      | 2015 | United Kingdom | To report the utilisation of HbA1c tests and establish how HbA1c testing frequency impacts on glycaemic control                                                                                                                                             |
| Holden WE et al <sup>45</sup>  | 1993 | US             | To test the utility of a novel collection system that allows measurement of theophylline in oral mucosal tracts to calculate serum theophylline concentrations.                                                                                             |
| Jacob et al <sup>46</sup>      | 2018 | Germany        | To analyze the frequency of blood pressure (BP) and estimated glomerular filtration rate (eGFR) monitoring in hypertension patients followed in primary care practices in Germany.                                                                          |
| Kadiyala R et al <sup>47</sup> | 2010 | GB             | To review the current literature on the association between thyroid dysfunction and diabetes mellitus, to highlight relevant clinical implications, and to examine present thyroid disease screening strategies in routine diabetes care.                   |
| Kent PD et al <sup>48</sup>    | 2004 | US             | To further define the risk factors for abnormal laboratory monitoring tests while receiving MTX and to determine whether these influence the need to maintain, decrease, or discontinue MTX.                                                                |
| Kessler et al <sup>49</sup>    | 2012 | Switzerland    | To evaluate the cost-effectiveness of microalbuminuria screening and subsequent treatment in different populations.                                                                                                                                         |
| Khan FA et al <sup>50</sup>    | 2015 | Saudi Arabia   | To analyze and compare the Cu(II), Fe(III), Mg(II), and Zn(II) statuses in T2DM with proteinuria, without proteinuria, and only proteinuria patients.                                                                                                       |
| Kneepkens EL <sup>51</sup>     | 2017 | Netherlands    | To describe how dried blood spot/finger prick can be used in a controlled environment in patients with rheumatic inflammatory diseases treated with adalimumab to obtain reliable estimates of serum concentrations of adalimumab and antiadalimumab (ADA). |
| Knudsen et al <sup>52</sup>    | 2012 | Denmark        | To evaluate the frequency of screening for microalbuminuria, albuminuria and renal function in patients with type 2 diabetes followed in primary care settings in Denmark.                                                                                  |
| Kostev et al <sup>53</sup>     | 2012 | Germany and UK | To measure the quality of diabetic care as indicated by HbA1c testing frequency and to compare the frequency of HbA1c testing in primary care diabetes patients in Germany (DE) and UK.                                                                     |
| Kostev et al <sup>54</sup>     | 2018 | Germany        | To analyse the annual frequency of HbA1c testing, as well as the factors associated with higher or lower testing frequency, in people with Type 2 diabetes mellitus in general practices and specialist diabetes practices in Germany.                      |
| Kostev et al <sup>55</sup>     | 2019 | Germany        | To analyze the frequency of BP and eGFR testing in T2DM patients followed in German general and diabetological practices.                                                                                                                                   |
| Lamb et al <sup>56</sup>       | 2014 | United Kingdom | To reduce uncertainty regarding the optimal method to estimate glomerular filtration rate (GFR) for disease detection and monitoring.                                                                                                                       |
| Lau et al <sup>57</sup>        | 2017 | US             | To describe changes made to Methotrexate dosing in response to elevated aspartate aminotransferase (AST) levels and define any correlation between elevated AST to Methotrexate dose and duration of therapy.                                               |
| Lenzi et al <sup>58</sup>      | 1987 | Italy          | To assess the clinical usefulness of glycated haemoglobin (HbA1) in monitoring diabetes                                                                                                                                                                     |

| Reference                            | Year | Location       | Research objective                                                                                                                                                                                                                                                                                                                                                                                                                                 |
|--------------------------------------|------|----------------|----------------------------------------------------------------------------------------------------------------------------------------------------------------------------------------------------------------------------------------------------------------------------------------------------------------------------------------------------------------------------------------------------------------------------------------------------|
| Liang et al <sup>59</sup>            | 2015 | United Kingdom | To (1) assess the frequency of proteinuria monitoring in patients with T2DM; (2) understand the association between proteinuria monitoring and renal disease risk factors in patients with T2DM, and whether the frequency of proteinuria testing varies by age, sex, smoking status, history of hypertension, renal complications, and antidiabetic drug therapy; and (3) evaluate the prevalence of proteinuria in patients with T2DM in the UK. |
| Lloyd LA et al <sup>60</sup>         | 2009 | United Kingdom | To audit methotrexate monitoring in all 29 general practices (GPs) in a Local Health Board.                                                                                                                                                                                                                                                                                                                                                        |
| Luqmani R et al <sup>61</sup>        | 1994 | United Kingdom | To determine the value of serial measurements of circulating cytokines in patients with rheumatoid arthritis in response to the introduction of disease modifying anti-rheumatic drugs (DMARDs).                                                                                                                                                                                                                                                   |
| Manski-Nankervis et al <sup>62</sup> | 2018 | Australia      | To explore: (1) the proportion of patients with T2D attending general practice who have had screening for, or ongoing monitoring of, CKD; (2) the proportion of patients without a documented diagnosis of CKD who have pathology consistent with CKD diagnosis; and (3) the patient factors associated with screening and the recording of a diagnosis of CKD.                                                                                    |
| McAlister et al <sup>63</sup>        | 2007 | Canada         | To examine the frequency of laboratory monitoring in patients newly started on antihypertensive therapy who did not have comorbidities or non-blood pressure lowering indications for these drugs; our primary interest was in determining whether the pattern of laboratory monitoring differed according to the drug class that was prescribed as initial monotherapy.                                                                           |
| McCoy et al <sup>64</sup>            | 2015 | USA            | To assess the extent and effect of excessive testing for glycated hemoglobin (HbA1c) among adults with controlled type 2 diabetes                                                                                                                                                                                                                                                                                                                  |
| McGill et al <sup>65</sup>           | 2004 | USA            | To assess the ability of 1,5AG measurements to monitor glycemic control in a cohort of 77 patients with diabetes (22 with type 1 diabetes, 55 with type 2 diabetes) who presented with suboptimal glycemic control at baseline (defined as HbA1c >7%).                                                                                                                                                                                             |
| McGovern AP et al <sup>66</sup>      | 2013 | United Kingdom | To investigate the association of adverse vascular and renal outcomes in people with diabetes, with or without hypertension, who did not have monitoring of their renal function.                                                                                                                                                                                                                                                                  |
| Mohiuddin et al <sup>67</sup>        | 2016 | United Kingdom | To assessed the cost-effectiveness of BNP-guided monitoring for heart failure in various patient subgroups                                                                                                                                                                                                                                                                                                                                         |
| Moroni et al <sup>68</sup>           | 2008 | Italy          | To assess the possible role of C3, C4, anti-dsDNA and anti-C1q in differentiating patients with active and inactive lupus nephritis (LN).                                                                                                                                                                                                                                                                                                          |
| Naing C et al <sup>69</sup>          | 2017 | NA             | To systematically review the evidence on the relationship between salivary glucose level and blood glucose level in monitoring glycaemia in patients with type 1 diabetes mellitus.                                                                                                                                                                                                                                                                |
| Nansseu JR et al <sup>70</sup>       | 2015 | NA             | To search for and summarise available evidence on the accuracy of fructosamine measurements to diagnose and monitor DM.                                                                                                                                                                                                                                                                                                                            |
| Nilsson E et al <sup>71</sup>        | 2018 | Sweden         | To assess to what extent the clinical heart failure guidelines are being followed regarding monitoring of creatinine and potassium through the initial weeks of mineralocorticoid receptor antagonists.                                                                                                                                                                                                                                            |
| Oke et al <sup>72</sup>              | 2012 | United Kingdom | To estimate, in a representative group of well-controlled patients with Type 2 diabetes: (1) the extent to which HbA1c varies over time between and within patients; (2) the extent to which change, defined as attaining an HbA1c                                                                                                                                                                                                                 |

| Reference                           | Year | Location       | Research objective                                                                                                                                                                                                                                                                                                                                                                                                                                                                                                                                                                                                                                |
|-------------------------------------|------|----------------|---------------------------------------------------------------------------------------------------------------------------------------------------------------------------------------------------------------------------------------------------------------------------------------------------------------------------------------------------------------------------------------------------------------------------------------------------------------------------------------------------------------------------------------------------------------------------------------------------------------------------------------------------|
|                                     |      |                | level $\leq 7.5\%$ (58.5 mmol/mol), could be accurately detected taking into account short-term, within patient variability and the length of the interval between the initial test and the follow up test.                                                                                                                                                                                                                                                                                                                                                                                                                                       |
| Ormseth et al <sup>73</sup>         | 2015 | USA            | To assess the utility of seven candidate plasma miRNAs, selected for biologic plausibility, for diagnosis of RA and use as markers of disease activity and cardiovascular risk in RA.                                                                                                                                                                                                                                                                                                                                                                                                                                                             |
| Onundarson PT et al <sup>74</sup>   | 2014 | Iceland        | To compare the use of two different warfarin monitoring tests (Fiix-prothrombin to prothrombin time) and their effect on fatal and non-fatal thromboembolism rate.                                                                                                                                                                                                                                                                                                                                                                                                                                                                                |
| Oskarsdottir AR et al <sup>75</sup> | 2018 | Iceland        | To compare anticoagulation outcome and dosing frequency during 12 months prior to switching from PT-INR based management (Pre-Fiix monitoring period) and during 12 months following switch to Fiix-NR monitoring (Fiix monitoring period).                                                                                                                                                                                                                                                                                                                                                                                                       |
| O'Sullivan JW et al <sup>76</sup>   | 2018 | United Kingdom | To identify overuse and underuse of diagnostic tests in primary care                                                                                                                                                                                                                                                                                                                                                                                                                                                                                                                                                                              |
| Parcero et al <sup>77</sup>         | 2011 | USA            | To assess association between meeting a target A1C level of $<7\%$ and adherence to monitoring guidelines.                                                                                                                                                                                                                                                                                                                                                                                                                                                                                                                                        |
| Pereira and Cachapuz <sup>78</sup>  | 2018 | Portugal       | To determine the prevalence of requesting outside guidance with HbA1c in patients with diabetes mellitus as a model, in order to identify the magnitude of inappropriate requesting                                                                                                                                                                                                                                                                                                                                                                                                                                                               |
| Perrotta PL et al <sup>79</sup>     | 2014 | US             | To measure how frequently diabetes mellitus patients are tested for hemoglobin A1c (HbA1c), low density lipoprotein, and urine protein and to determine whether the frequencies with which these analytes are tested are consistent with recognized guidelines.                                                                                                                                                                                                                                                                                                                                                                                   |
| Razi F et al <sup>80</sup>          | 2015 | Iran           | To assess the variability of the results obtained from different techniques in two groups of T2D patients: those with controlled blood glucose levels, and the patients with uncontrolled glucose concentrations.                                                                                                                                                                                                                                                                                                                                                                                                                                 |
| Rickard JP et al <sup>81</sup>      | 2018 | US             | To determine the rates at which monitoring of amiodarone or dofetilide was performed in accordance with package labels and published guidelines and to determine rates of severe adverse drug events                                                                                                                                                                                                                                                                                                                                                                                                                                              |
| Satoh K et al <sup>82</sup>         | 2012 | Japan          | To establish an assay system for cilostazol monitoring, using AA-induced platelet aggregation in the presence of PGE1, since AA appears to be most sensitive to the inhibitory effect of cilostazol.                                                                                                                                                                                                                                                                                                                                                                                                                                              |
| Sezgin G et al <sup>83</sup>        | 2018 | Australia      | To describe general practice activity and characteristics of pathology test ordering based on electronic health record data. Investigate compliance with evidence-based guidelines to determine the appropriateness and quality use of pathology in general practice.                                                                                                                                                                                                                                                                                                                                                                             |
| Shah KB et al <sup>84</sup>         | 2008 | Not specified  | To study how well patients taking spironolactone are monitored for hyperkalemia                                                                                                                                                                                                                                                                                                                                                                                                                                                                                                                                                                   |
| Shardlow A et al <sup>85</sup>      | 2017 | United Kingdom | To assess the impact of use of cystatin-C-based and combined creatinine and cystatin C eGFR compared to standard creatinine-based estimates in a primary care population with baseline CKD stage 3, defined by 2 measures of GFR more than 90 days apart, and to evaluate the non-GFR determinants of cystatin-C-based eGFR. Additionally, we compared creatinine- and cystatin-C-based estimates of GFR over 5 years of follow-up and evaluated the prognostic accuracy of cystatin C in risk prediction. Finally, we evaluated the cost implications of implementing NICE guidance to confirm a diagnosis of CKD G3aA1 based on creatinine eGFR |

| Reference                         | Year | Location       | Research objective                                                                                                                                                                                                                                   |
|-----------------------------------|------|----------------|------------------------------------------------------------------------------------------------------------------------------------------------------------------------------------------------------------------------------------------------------|
|                                   |      |                | (eGFRcreat) by checking cystatin C eGFR (eGFRcys) and also considered the use of creatinine and cystatin C eGFR (eGFRcreat-cys) as an alternative strategy.                                                                                          |
| Stevens RJ et al <sup>86</sup>    | 2010 | United Kingdom | To develop a general framework for modelling the control phase of a monitoring programme, by reviewing the statistical models that have been used to study the transition between phases three and four in recent papers in diverse clinical fields. |
| Tanaka H et al <sup>87</sup>      | 2016 | Japan          | To assess the process quality of diabetes care in terms of persistent follow-up and routine examinations of glycemic control and other complications under favorable access to healthcare conditions using health insurance claims data.             |
| Thorpe CT et al <sup>88</sup>     | 2012 | US             | To examine the extent to which receipt of annual HbA1c tests, LDL-C tests, and eye examinations differed for patients with and without comorbid dementia.                                                                                            |
| van Bruggen S et al <sup>89</sup> | 2019 | Netherlands    | To investigate the association between full monitoring of biomedical and lifestyle-related diabetes target indicators and HbA1c level in patients with T2DM who receive a structured diabetes care protocol facilitated by a care group.             |
| Van de Ree et al <sup>90</sup>    | 2001 | Netherlands    | To compare the Cockcroft formula with the endogenous creatinine clearance for estimation of the GFR to evaluate the influence of extreme obesity in T2DM n the formulas.                                                                             |
| Wang B et al <sup>91</sup>        | 2017 | China          | To compare the glucose concentrations in mixed saliva from all salivary glands (i.e., saliva secreted into the oral cavity), unstimulated parotid glands, and blood glucose in patients with type 2DM and subjects without diabetes.                 |
| Wermeling PR et al <sup>92</sup>  | 2014 | Netherlands    | To investigate whether 6-monthly monitoring of well-controlled type 2 diabetes patients results in equivalent cardiometabolic control at reduced costs compared to 3-monthly monitoring.                                                             |
| Yamanouchi T et al <sup>93</sup>  | 1996 | Japan          | To assess the utility of serum measurements of 1,5AG in assessing the control of plasma glucose in patients with non-insulin-dependent diabetes mellitus (NIDDM).                                                                                    |
| Yoo KH et al <sup>94</sup>        | 2017 | Korea          | To analyze compliance to the HbA1c testing guideline and explore individual and area level determinants associated with compliance, focusing on the regional differences                                                                             |

## References

1. Afifa K, Belguith Asma S, Nabil H, et al. Screening for Nephropathy in Diabetes Mellitus: Is Micral-Test Valid among All Diabetics? *Int J Chronic Dis*. 2016;2016:2910627.
2. Aizpuru F, Latorre A, Ibanez B, et al. Variability in the detection and monitoring of chronic patients in primary care according to what is registered in the electronic health record. *Fam Pract*. 2012;29(6):696-705.
3. Al-Foraih N, Touma Z, Chatterley T, Keeling S. The Role of Laboratory Tests in Monitoring Systemic Lupus Erythematosus: A Systematic Review. *J Rheumatol*. 2017;44(6):906-907.
4. Allen AS, Forman JP, Orav EJ, Bates DW, Denker BM, Sequist TD. Primary care management of chronic kidney disease. *J Gen Intern Med*. 2011;26(4):386-392.
5. Al-Naher A, Wright D, Devonald MAJ, Pirmohamed M. Renal function monitoring in heart failure - what is the optimal frequency? A narrative review %J British Journal of Clinical Pharmacology.84(1):5-17.
6. Arena TR, Jerico Mde C, de Castro LC, Castilhod V, Lima AF. [Spending with unnecessary complementary tests for hypertension and diabetes in health services]. *Rev Gaucha Enferm*. 2014;35(4):86-93.
7. Aziz KM. Correlation of Urine Biomarkers: Microalbuminuria and Spot Urine Protein among Diabetic Patients. Application of Spot Urine Protein in Diabetic Kidney Disease, Nephropathy, Proteinuria Estimation, Diagnosing and Monitoring. *Recent Pat Endocr Metab Immune Drug Discov*. 2015;9(2):121-133.
8. Bajwa-Dulai ST, Dulai PS, Kieffer KA. Limited provider response to abnormal microalbumin test results: Implications for the utility of screening rate as a quality of care metric %J Journal of General Internal Medicine.1:S115.
9. Bakarman MA, Kurashi NY, Hanif M. Utilization of laboratory investigations in primary health care centers in Al-khobar, saudi arabia. *J Family Community Med*. 1997;4(1):37-45.
10. Bell KJ, Glasziou PP, Hayen A, Irwig L. Criteria for monitoring tests were described: validity, responsiveness, detectability of long-term change, and practicality. *J Clin Epidemiol*. 2014;67(2):152-159.
11. Bialkowska-Warzecha J. Assessment of <sup>99m</sup>Tc-Hepida plasma clearance test evaluation for monitoring of acute and chronic liver diseases. 1998;4(1):153-157.
12. Bozic-Mijovski M, Malmstrom RE, Malovrh P, et al. Diluted thrombin time reliably measures low to intermediate plasma dabigatran concentrations. *Ann Clin Biochem*. 2016;53(Pt 4):446-451.
13. Bramlage P, Wittchen HU, Pittrow D, et al. [Diabetes, hypertension and microalbuminuria in primary care]. *Fortschr Med Orig*. 2003;121 Suppl 1:33-38.
14. Bull BS, Levy WC, Westengard JC, et al. Ranking of laboratory tests by consensus analysis. *Lancet*. 1986;2(8503):377-380.
15. Cohen SS, Chamberlain AM, Killian JM, Monda KL, Weston SA, Okerson T. LDLC monitoring frequency after the diagnosis of diabetes or atherosclerotic cardiovascular disease. 2017;136.
16. Coleman JJ, McDowell SE, Evans SJ, Gill PS, Ferner RE. Oversight: a retrospective study of biochemical monitoring in patients beginning antihypertensive drug treatment in primary care. *Br J Clin Pharmacol*. 2010;70(1):109-117.



17. Crippa M, Camanini S, Costa R, et al. Uric acid as a possible marker of cardiovascular risk in an essential hypertensive population. *19*:173.
18. Curtis JR, John A, Baser O. Dyslipidemia and changes in lipid profiles associated with rheumatoid arthritis and initiation of anti-tumor necrosis factor therapy. *Arthritis Care Res (Hoboken)*. 2012;64(9):1282-1291.
19. Dauernheimer Machado J, Boff R, Aguiar Soares A, Da Silva Rodrigues L, Lins Camargo J, Pinho Silveiro S. Accuracy of creatinine and cystatin C equations to estimate glomerular filtration rate in patients with type 2 diabetes. *1*:S618.
20. DeLong ER, Vernon WB, Bollinger RR. Sensitivity and specificity of a monitoring test. *Biometrics*. 1985;41(4):947-958.
21. Doganer YC, Rohrer JE, Angstman KB, Merry SP, Erickson JL. Variations in lipid screening frequency in family medicine patients with cardiovascular risk factors. *J Eval Clin Pract*. 2015;21(2):215-220.
22. Dolan G, Smith LA, Collins S, Plumb JM. Effect of setting, monitoring intensity and patient experience on anticoagulation control: a systematic review and meta-analysis of the literature. *Curr Med Res Opin*. 2008;24(5):1459-1472.
23. Doll H, Shine B, Kay J, James T, Glasziou P. The rise of cholesterol testing: how much is unnecessary. *Br J Gen Pract*. 2011;61(583):e81-88.
24. Duddy C, Wong G. Explaining variations in test ordering in primary care: protocol for a realist review. *BMJ Open*. 2018;8(9):e023117.
25. Duff CJ, Solis-Trapala I, Driskell OJ, et al. The frequency of testing for glycated haemoglobin, HbA1c, is linked to the probability of achieving target levels in patients with suboptimally controlled diabetes mellitus. *Clin Chem Lab Med*. 2018;57(2):296-304.
26. Dufour DR, Lott JA, Nolte FS, Gretch DR, Koff RS, Seeff LB. Diagnosis and monitoring of hepatic injury. I. Performance characteristics of laboratory tests. *Clin Chem*. 2000;46(12):2027-2049.
27. Elhayany A, Mishaal RA, Vinker S. Is there clinical benefit to routine enzyme testing of patients on statins? *Expert Opin Drug Saf*. 2012;11(2):185-190.
28. Farmer AJ, Stevens R, Hirst J, et al. Optimal strategies for identifying kidney disease in diabetes: properties of screening tests, progression of renal dysfunction and impact of treatment - systematic review and modelling of progression and cost-effectiveness. *Health Technol Assess*. 2014;18(14):1-128.
29. Fazlalizadeh H, Pellicori P, Zhang J, et al. Screening with natriuretic peptides to detect micro- and macro-vascular complications amongst older patients with type-2 diabetes mellitus. a report from sica-diabetes study. *European Journal of Heart Failure*. 2014;16:312-312.
30. Fazlalizadeh H, Pellicori P, Zhang J, et al. Natriuretic peptides or glycosolated haemoglobin as markers of microand macro-vascular complications amongst older patients with type-2 diabetes mellitus. a report from sica-diabetes study. *1*:333.
31. Fischer SH, Tjia J, Reed G, Peterson D, Gurwitz JH, Field TS. Factors associated with ordering laboratory monitoring of high-risk medications. *J Gen Intern Med*. 2014;29(12):1589-1598.
32. Flynn D, Murphy P. Audit of new oral anticoagulant monitoring in a general practice: Are patients having their renal function checked? *Irish Journal of Medical Science*. 2015;184:251-S252.
33. Garg D, Naugler C, Bhella V, Yeasmin F. Chronic kidney disease in type 2 diabetes: Does an abnormal urine albumin-to-creatinine ratio need to be retested? *Can Fam Physician*. 2018;64(10):e446-e452.

34. Garg D, Thind A, Maddocks H. Screening for chronic kidney disease in primary care patients with type 2 diabetes Longitudinal study.64:S68.
35. Glasziou PP, Irwig L, Heritier S, Simes RJ, Tonkin A, Investigators LS. Monitoring cholesterol levels: measurement error or true change? *Ann Intern Med*. 2008;148(9):656-661.
36. Glasziou PP, Irwig L, Kirby AC, Tonkin AM, Simes RJ. Which lipid measurement should we monitor? An analysis of the LIPID study. *BMJ Open*. 2014;4(2):e003512.
37. Griger DR, Higgs JB, Roane DW. Azathioprine hepatotoxicity is uncommon in patients with Rheumatic diseases. *J Clin Rheumatol*. 1999;5(2):60-64.
38. Gudmundsdottir BR, Onundarson PT. Warfarin Anticoagulation Variability, Testing, and Dose-Adjustment Frequency Is Reduced in Clinical Practice after Switch from Prothrombin Time Based International Normalized Ratio (Inr) to Fiix-Prothrombin Time Based Normalized Ratio (Fiix-Nr). *American Journal of Hematology*. 2018;93(9):E23-E23.
39. Hajati F, Atlantis E, Bell KJL, Girosi F. Patterns and trends of potentially inappropriate high-density lipoprotein cholesterol testing in Australian adults at high risk of cardiovascular disease from 2008 to 2014: analysis of linked individual patient data from the Australian Medicare Benefits Schedule and Pharmaceutical Benefits Scheme. *BMJ Open*. 2018;8(3):e019041.
40. Harano Y, Kosugi K, Hyosu T, et al. Ketone bodies as markers for type 1 (insulin-dependent) diabetes and their value in the monitoring of diabetic control. *Diabetologia*. 1984;26(5):343-348.
41. Harish S, Shantaram M. A comparative and correlative study between blood and salivary glucose with blood HbA1c in type 2 diabetes. *International Journal of Pharmaceutical Sciences and Research*. 2019;10(1):401-406.
42. Heyman C, Gunnarsson R. Normal S-cholesterol indicates unchanged S-LDL, S-HDL and S-triglycerides in patients with previously acceptable blood lipids. *Scand J Clin Lab Invest*. 2007;67(5):498-506.
43. Hinton W, McGovern A, Arrowsmith B, Munro N, Whyte M, De Lusignan S. Disparities in the monitoring and complication screening of people with Type 2 diabetes %J Diabetic Medicine.34:156.
44. Hirst JA, Stevens RJ, Shine B, James T, Farmer AJ. Frequency of HbA1c test requests in primary care: an analysis of hospital laboratory data. *Diabetic Medicine*. 2015;32:169-170.
45. Holden WE, Bartos F, Theime T, Green TR, Fitchen JH. Theophylline in oral mucosal transudate. A practical method for monitoring outpatient therapy. *Am Rev Respir Dis*. 1993;147(3):739-743.
46. Jacob L, Seitz F, Kostev K. Frequency of blood pressure and estimated glomerular filtration rate monitoring in patients affected by hypertension: a retrospective study with 176 565 patients in Germany. *Blood Press Monit*. 2018;23(2):85-90.
47. Kadiyala R, Peter R, Okosieme OE. Thyroid dysfunction in patients with diabetes: clinical implications and screening strategies. *Int J Clin Pract*. 2010;64(8):1130-1139.
48. Kent PD, Luthra HS, Michet C, Jr. Risk factors for methotrexate-induced abnormal laboratory monitoring results in patients with rheumatoid arthritis. *J Rheumatol*. 2004;31(9):1727-1731.
49. Kessler R, Keusch G, Szucs TD, et al. Health economic modelling of the cost-effectiveness of microalbuminuria screening in Switzerland. *Swiss Med Wkly*. 2012;142:w13508.

50. Khan FA, Al Jameil N, Arjumand S, et al. Comparative Study of Serum Copper, Iron, Magnesium, and Zinc in Type 2 Diabetes-Associated Proteinuria. *Biol Trace Elem Res*. 2015;168(2):321-329.
51. Kneepkens EL, Pouw MF, Wolbink GJ, et al. Dried blood spots from finger prick facilitate therapeutic drug monitoring of adalimumab and anti-adalimumab in patients with inflammatory diseases. *Br J Clin Pharmacol*. 2017;83(11):2474-2484.
52. Knudsen ST, Mosbech TH, Hansen B, Konig E, Johnsen PC, Kamper AL. Screening for microalbuminuria in patients with type 2 diabetes is incomplete in general practice. *Dan Med J*. 2012;59(9):A4502.
53. Kostev K, Grunow S, Rockel T. HbA1c Testing Frequency in Primary Care Diabetes Patients in Germany and in the Uk. *Value in Health*. 2012;15(7):A519-A519.
54. Kostev K, Jacob L, Lucas A, Rathmann W. Low annual frequency of HbA1c testing in people with Type 2 diabetes in primary care practices in Germany. *Diabet Med*. 2018;35(2):249-254.
55. Kostev K, Lucas A, Jacob L. Frequency of Blood Pressure and Estimated Glomerular Filtration Rate Testing in Type 2 Diabetes Mellitus: A Retrospective Study with 43,509 Patients. *Exp Clin Endocrinol Diabetes*. 2019;127(7):455-460.
56. Lamb EJ, Brettell EA, Cockwell P, et al. The eGFR-C study: accuracy of glomerular filtration rate (GFR) estimation using creatinine and cystatin C and albuminuria for monitoring disease progression in patients with stage 3 chronic kidney disease--prospective longitudinal study in a multiethnic population. *BMC Nephrol*. 2014;15(13):13.
57. Lau CC, Sayeed SM, Kennedy A, Skelly J, Cooper S. Are we over-testing for liver enzyme abnormalities in rheumatoid arthritis patients prescribed methotrexate? 2017;69.
58. Lenzi S, Giampietro O, Giovannitti G, Sampietro T, Miccoli R, Navalesi R. The clinical usefulness of glycated hemoglobin in monitoring diabetes mellitus: a long-term study. *Clin Chem*. 1987;33(1):55-56.
59. Liang H, Kennedy C, Manne S, Lin JH, Dolin P. Monitoring for proteinuria in patients with type 2 diabetes mellitus. *BMJ Open Diabetes Res Care*. 2015;3(1):e000071.
60. Lloyd LA, Breslin A, Jones J. An Audit of Methotrexate Monitoring in Primary Care as Part of a Shared Care Agreement. *Rheumatology*. 2009;48:I61-I61.
61. Luqmani R, Sheeran T, Robinson M, Richardson K, Winkles J, Emery P. Systemic cytokine measurements: their role in monitoring the response to therapy in patients with rheumatoid arthritis. *Clin Exp Rheumatol*. 1994;12(5):503-508.
62. Manski-Nankervis JE, Thuraingam S, Lau P, et al. Screening and diagnosis of chronic kidney disease in people with type 2 diabetes attending Australian general practice. *Aust J Prim Health*. 2018;24(3):280-286.
63. McAlister FA, Tu K, Majumdar SR, Padwal R, Chen Z, Campbell NR. Laboratory testing in newly treated elderly hypertensive patients without co-morbidities: a population-based cohort study. *Open Med*. 2007;1(2):e60-67.
64. McCoy RG, Van Houten HK, Ross JS, Montori VM, Shah ND. HbA1c overtesting and overtreatment among US adults with controlled type 2 diabetes, 2001-13: observational population based study. *Bmj*. 2015;351:h6138.
65. McGill JB, Cole TG, Nowatzke W, et al. Circulating 1,5-anhydroglucitol levels in adult patients with diabetes reflect longitudinal changes of glycemia: a U.S. trial of the GlycoMark assay. *Diabetes Care*. 2004;27(8):1859-1865.

66. McGovern AP, Rusholme B, Jones S, et al. Association of chronic kidney disease (CKD) and failure to monitor renal function with adverse outcomes in people with diabetes: a primary care cohort study. *BMC Nephrol*. 2013;14:198.
67. Mohiuddin S, Hollingworth W, Maishman R, et al. A Model-Based Cost-Effectiveness Analysis of B-Type Natriuretic Peptide Monitoring in Patients with Heart Failure. *Value in Health*. 2016;19(7):A867-A867.
68. Moroni G, Radice A, Giammarresi G, et al. Are laboratory tests useful for monitoring the activity of lupus nephritis? A 6-year prospective study in a cohort of 228 patients with lupus nephritis. *Ann Rheum Dis*. 2009;68(2):234-237.
69. Naing C, Mak JW. Salivary glucose in monitoring glycaemia in patients with type 1 diabetes mellitus: a systematic review. *J Diabetes Metab Disord*. 2017;16(2):2.
70. Nansseu JR, Fokom-Domgue J, Noubiap JJ, Balti EV, Sobngwi E, Kengne AP. Fructosamine measurement for diabetes mellitus diagnosis and monitoring: a systematic review and meta-analysis protocol. *BMJ Open*. 2015;5(5):e007689.
71. Nilsson E, De Deco P, Trevisan M, et al. A real-world cohort study on the quality of potassium and creatinine monitoring during initiation of mineralocorticoid receptor antagonists in patients with heart failure. *Eur Heart J Qual Care Clin Outcomes*. 2018;4(4):267-273.
72. Oke JL, Stevens RJ, Gaitskell K, Farmer AJ. Establishing an evidence base for frequency of monitoring glycated haemoglobin levels in patients with Type 2 diabetes: projections of effectiveness from a regression model. *Diabet Med*. 2012;29(2):266-271.
73. Ormseth M, Solus J, Vickers K, Oeser A, Raggi P, Stein CM. Utility of Select Plasma Mirnas for Diagnosis of Rheumatoid Arthritis and Monitoring of Disease Activity and Cardiovascular Risk. *Annals of the Rheumatic Diseases*. 2015;74:696-696.
74. Onundarson PT, Francis CW, Bjornsson ES, et al. Monitoring Warfarin with the Fiix-Prothrombin Time Improves Anticoagulation Stability and Long-Term Clinical Outcome. the Fiix-Trial. *Blood*. 2014;124(21).
75. Oskarsdottir AR, Gudmundsdottir BR, Onundarson PT. Replacing PT-INR Monitoring of Warfarin with Fiix-NR in Clinical Practice Reduces Thromboembolism without Increasing Bleeding Despite Reduced Number of Dose Adjustments. *Blood*. 2018;132.
76. O'Sullivan JW, Albasri A, Nicholson BD, et al. Overtesting and undertesting in primary care: a systematic review and meta-analysis. *BMJ Open*. 2018;8(2):e018557.
77. Parcero AF, Yaeger T, Bienkowski RS. Frequency of Monitoring Hemoglobin A1C and Achieving Diabetes Control. *J*. 2011;2(3):205-208.
78. Pereira M, Cachapuz I. Inappropriate requesting of glycated hemoglobin (HbA1C). *Clinical Chemistry and Laboratory Medicine*. 2018;56 (2):eA8.
79. Perrotta PL, Jones R, Souers RJ, Darcy TP, Howanitz PJ. Frequency monitoring of hemoglobin A1c, low-density lipoprotein, and urine protein laboratory testing: a College of American Pathologists Q-Probes study. *Arch Pathol Lab Med*. 2014;138(8):1009-1014.
80. Razi F, Nasli Esfahani E, Rahnamaye Farzami M, et al. Effect of the different assays of HbA1c on diabetic patients monitoring. *Journal of Diabetes & Metabolic Disorders*. 2015;14:65.
81. Rickard JP, Negrelli J, Olson JL, Dick T. Frequency of Adverse Event Monitoring in Ambulatory Patients on Amiodarone or Dofetilide. *J Pharm Pract*. 2018;31(5):457-461.

82. Satoh K, Fukasawa I, Kanemaru K, et al. Platelet aggregometry in the presence of PGE(1) provides a reliable method for cilostazol monitoring. *Thromb Res.* 2012;130(4):616-621.
83. Sezgin G, Georgiou A, Hardie RA, et al. Compliance with pathology testing guidelines in Australian general practice: protocol for a secondary analysis of electronic health record data. *BMJ Open.* 2018;8(11):6.
84. Shah KB, Gottlieb SS. Laboratory monitoring for spironolactone in congestive heart failure. *HCPLive.* 2008.
85. Shardlow A, McIntyre NJ, Fraser SDS, et al. The clinical utility and cost impact of cystatin C measurement in the diagnosis and management of chronic kidney disease: A primary care cohort study. *PLoS Med.* 2017;14(10):e1002400.
86. Stevens RJ, Oke J, Perera R. Statistical models for the control phase of clinical monitoring. *Stat Methods Med Res.* 2010;19(4):394-414.
87. Tanaka H, Tomio J, Sugiyama T, Kobayashi Y. Process quality of diabetes care under favorable access to healthcare: a 2-year longitudinal study using claims data in Japan. *BMJ Open Diabetes Res Care.* 2016;4(1):e000291.
88. Thorpe CT, Thorpe JM, Kind AJ, Bartels CM, Everett CM, Smith MA. Receipt of monitoring of diabetes mellitus in older adults with comorbid dementia. *J Am Geriatr Soc.* 2012;60(4):644-651.
89. van Bruggen S, Rauh SP, Kasteleyn MJ, Bonten TN, Chavannes NH, Numans ME. Association between full monitoring of biomedical and lifestyle target indicators and HbA1c level in primary type 2 diabetes care: an observational cohort study (ELZHA-cohort 1). *BMJ Open.* 2019;9(3):e027208.
90. van de Ree MA, Christiaan G, Huisman MV, van der Vijver JC, Meinders AE. Monitoring renal function in obese patients with type 2 diabetes mellitus in daily practice. *Diabetes Nutr Metab.* 2001;14(2):66-70.
91. Wang B, Du J, Zhu Z, Ma Z, Wang S, Shan Z. Evaluation of Parotid Salivary Glucose Level for Clinical Diagnosis and Monitoring Type 2 Diabetes Mellitus Patients. *Biomed Res Int.* 2017;2017:2569707.
92. Wermeling PR, Gorter KJ, Stellato RK, de Wit GA, Beulens JW, Rutten GE. Effectiveness and cost-effectiveness of 3-monthly versus 6-monthly monitoring of well-controlled type 2 diabetes patients: a pragmatic randomised controlled patient-preference equivalence trial in primary care (EFFIMODI study). *Diabetes Obes Metab.* 2014;16(9):841-849.
93. Yamanouchi T, Ogata N, Tagaya T, et al. Clinical usefulness of serum 1,5-anhydroglucitol in monitoring glycaemic control. *Lancet.* 1996;347(9014):1514-1518.
94. Yoo KH, Shin DW, Cho MH, et al. Regional variations in frequency of glycosylated hemoglobin (HbA1c) monitoring in Korea: A multilevel analysis of nationwide data. *Diabetes Res Clin Pract.* 2017;131:61-69.
